# Supplementary material
Source: PubMed Central journal article supplement (PMC4825012)
Supplement: 10.1074_M115.701268_jbc.M115.701268-1.pdf [file 10.1074_M115.701268_jbc.M115.701268-1.pdf]

| R258C       | Fold-change | P279S     | G324D     | N340S     |
|-------------|-------------|-----------|-----------|-----------|
| tyrS        | 4.43        |           |           |           |
| <b>rydC</b> | 4.25        |           |           |           |
| <b>ydcH</b> | 3.88        | +         |           |           |
| <b>gapC</b> | 3.74        |           |           |           |
| <b>aldA</b> | 3.12        |           | ++        |           |
| <b>ydcP</b> | 3           |           |           |           |
| mokA        | 2.98        |           |           |           |
| yfhR        | 2.87        | ++        | ++        | ++        |
| <b>fimC</b> | 2.84        | ++        | ++        | +         |
| <b>ydcY</b> | 2.79        |           |           |           |
| efeO        | 2.7         |           |           |           |
| borD        | 2.68        |           |           |           |
| <b>hicB</b> | 2.67        |           |           |           |
| fimD        | 2.63        | ++        | ++        | ++        |
| <b>ydcD</b> | 2.63        | ++        |           |           |
| rcbA        | 2.56        |           |           |           |
| <b>ydcZ</b> | 2.53        |           |           |           |
| <b>insP</b> | 2.44        |           |           |           |
| <b>racR</b> | 2.43        |           |           |           |
| <b>ydcA</b> | 2.41        |           |           |           |
| <b>ydaW</b> | 2.39        |           |           |           |
| <b>cybB</b> | 2.38        |           | ++        |           |
| <b>rzpD</b> | 2.35        |           |           |           |
| shoB        | 2.35        |           |           |           |
| <b>yjeV</b> | 2.33        |           |           |           |
| <b>insQ</b> | 2.31        |           |           |           |
| <b>mgTA</b> | <b>2.31</b> | <b>++</b> | <b>++</b> | <b>++</b> |
| <b>uspE</b> | 2.29        |           |           |           |
| fimI        | 2.29        | +         | ++        | +         |
| <b>ydcX</b> | 2.27        |           |           |           |
| rbsR        | 2.21        |           |           |           |
| rlmN        | 2.2         |           | +         |           |
| nrdG        | 2.2         |           |           |           |
| yigE        | 2.11        |           |           |           |
| ylfF        | 2.11        | ++        | ++        | +         |
| Rho         | 2.1         |           |           |           |
| <b>dgcZ</b> | 2.09        |           |           |           |
| ykfH        | 2.06        | ++        | ++        | ++        |
| fimF        | 2.05        | ++        | ++        | ++        |
| insC1       | 2.04        | ++        | ++        | ++        |
| <b>pinQ</b> | 2           | ++        |           |           |
| mngR        | 2           |           |           |           |
| ilvX        | 1.99        |           | +         |           |
| rbsK        | 1.98        |           |           |           |
| efeB        | 1.98        |           |           |           |
| fimA        | 1.98        | +         | +         | +         |
| <b>ydcR</b> | 1.96        |           |           |           |
| nmpC        | 1.95        |           |           |           |
| yghF        | 1.93        |           |           |           |
| suhB        | 1.92        |           |           |           |
| <b>dusC</b> | 1.9         |           |           |           |
| rsmG        | 1.9         |           |           |           |
| zraP        | 1.88        |           |           |           |
| nrdD        | 1.86        |           | +         |           |
| ykfG        | 1.86        | ++        | ++        | ++        |
| <b>ttcA</b> | 1.85        |           |           |           |
| wecF        | 1.85        | ++        | ++        | ++        |
| proW        | 1.84        |           |           |           |
| <b>cfa</b>  | 1.84        |           |           |           |
| hsrA        | 1.84        |           |           |           |
| yafW        | 1.83        | ++        | ++        | ++        |
| fimG        | 1.83        | ++        | ++        | ++        |
| ydhB        | 1.82        |           |           |           |
| efeU        | 1.82        |           |           |           |
| insZ        | 1.8         |           |           |           |
| <b>tehB</b> | 1.77        |           |           |           |
| rlmC        | 1.77        |           |           |           |
| ydiE        | 1.77        | ++        | ++        |           |
| <b>rrrD</b> | 1.77        |           |           |           |
| truD        | 1.76        |           | ++        |           |
| gntP        | 1.76        |           |           |           |

| R258C       | Fold-change | P279S | G324D | N340S |
|-------------|-------------|-------|-------|-------|
| dnaE        | 1.74        |       |       |       |
| yncJ        | 1.74        |       |       |       |
| <b>ridA</b> | 1.71        |       |       |       |
| yhil        | 1.71        | +     | +     | +     |
| insH1       | 1.71        |       |       |       |
| insJ        | 1.71        | ++    | +     | ++    |
| nuoC        | 1.71        |       |       |       |
| nuoL        | 1.7         |       |       |       |
| yafX        | 1.7         | ++    | ++    | ++    |
| sokB        | 1.7         |       |       | +     |
| <b>ydhI</b> | 1.69        | ++    | ++    | +     |
| ybaA        | 1.69        | ++    |       |       |
| fabF        | 1.68        |       | ++    |       |
| <b>ymjD</b> | 1.67        | +     | +     | +     |
| <b>ymdE</b> | 1.67        | +     | +     | +     |
| ymfD        | 1.67        | ++    | ++    |       |
| hybG        | 1.67        |       |       |       |
| pyrE        | 1.66        |       |       |       |
| <b>truB</b> | 1.65        |       |       |       |
| oppC        | 1.65        |       |       |       |
| queA        | 1.64        |       |       |       |
| <b>truA</b> | 1.64        |       |       |       |
| tdrA        | 1.64        |       |       |       |
| yqhQ        | 1.64        |       |       |       |
| rdlC        | 1.64        |       |       |       |
| yahA        | 1.63        | ++    | ++    | ++    |
| yhjV        | 1.63        |       |       |       |
| <b>chaA</b> | 1.63        |       |       |       |
| <b>proS</b> | 1.63        |       |       |       |
| yceF        | 1.63        |       |       |       |
| glyS        | 1.62        |       |       |       |
| mnmG        | 1.62        |       |       |       |
| yidD        | 1.62        |       |       |       |
| <b>ydcL</b> | 1.61        |       |       |       |
| thil        | 1.6         |       |       |       |
| yahB        | 1.6         |       |       |       |
| cmoB        | 1.57        |       |       |       |
| glfI        | 1.57        | +     | +     |       |
| malK        | 1.56        |       |       |       |
| abrB        | 1.56        |       |       |       |
| <b>yegZ</b> | 1.55        | +     | +     | +     |
| wzyE        | 1.55        | ++    | ++    | ++    |
| ykgH        | 1.55        |       | ++    |       |
| rlmL        | 1.55        |       | ++    |       |
| rsxC        | 1.55        |       | ++    | ++    |
| rnhB        | 1.55        |       |       |       |
| gfcE        | 1.54        | +     | ++    | ++    |
| yajL        | 1.54        |       | +     |       |
| rfaH        | 1.53        |       |       |       |
| sodA        | 1.52        |       |       |       |
| ykfl        | 1.52        | ++    | ++    | ++    |
| yjfZ        | 1.52        | ++    | ++    | ++    |
| ycfZ        | 1.52        | ++    |       |       |
| proX        | 1.52        |       |       |       |
| prfC        | 1.51        |       | ++    |       |
| tdrB        | 1.51        |       |       |       |
| trmH        | 1.51        |       |       |       |
| tcdA        | 1.51        |       |       |       |
| nuoM        | 1.51        |       |       |       |
| yebZ        | 1.51        |       |       |       |
| wecD        | 1.51        | +     | +     | +     |
| slyA        | 1.5         |       |       |       |
| rlmM        | 1.5         |       |       |       |
| yfcJ        | 1.5         | ++    | ++    | ++    |
| rlmN        | 1.49        |       |       |       |
| mnmA        | 1.49        |       |       |       |
| yceI        | 1.49        | +     |       |       |
| ybcI        | 1.49        |       |       |       |
| ydcI        | 1.49        |       |       |       |

| G181D       | Fold-change | P279S | G324D | N340S |
|-------------|-------------|-------|-------|-------|
| pyrB        | 4.66        |       |       |       |
| pyrI        | 4.48        |       |       |       |
| <b>ydcH</b> | 5.61        | +     |       |       |
| <b>rydC</b> | 4.57        |       |       |       |
| <b>ydcD</b> | 3.85        | ++    |       |       |
| dmsA        | 3.66        | ++    |       |       |
| nrfA        | 3.6         | +     | +     |       |
| bssR        | 3.59        | ++    |       |       |
| tdcD        | 3.57        |       |       | +     |
| dmsB        | 3.56        | ++    |       |       |
| <b>pinQ</b> | 3.54        | ++    |       |       |
| <b>hicB</b> | 3.39        |       |       |       |
| yceI        | 3.39        | ++    | +     |       |
| dmsC        | 3.15        | +     |       |       |
| nrfC        | 3.13        | +     | +     |       |
| carA        | 3.12        |       | ++    | ++    |
| rimL        | 3.06        |       |       |       |
| grpE        | 3.04        |       |       |       |
| ompW        | 2.98        |       |       | ++    |
| carB        | 2.91        |       | ++    | +     |
| <b>racR</b> | 2.9         |       |       |       |
| iraM        | 2.88        |       |       |       |
| ycaC        | 2.87        |       |       |       |
| <b>ydaW</b> | 2.85        |       |       |       |
| ansB        | 2.81        |       |       |       |
| <b>insP</b> | 2.78        |       |       |       |
| nrfD        | 2.77        | +     | +     |       |
| <b>ydcY</b> | 2.77        |       |       |       |
| <b>uspE</b> | 2.72        |       |       |       |
| yfnE        | 2.69        | ++    | ++    |       |
| <b>ydcA</b> | 2.68        |       |       |       |
| cysQ        | 2.64        | +     | +     | +     |
| <b>insQ</b> | 2.62        |       |       |       |
| <b>ttcA</b> | 2.56        |       |       |       |
| ybbD        | 2.55        | +     | +     | +     |
| nrfB        | 2.54        | +     | +     | +     |
| <b>ydcZ</b> | 2.53        |       |       |       |
| <b>cfa</b>  | 2.52        |       |       |       |
| tomB        | 2.45        |       |       |       |
| yjhQ        | 2.43        | +     | ++    | ++    |
| <b>ydcX</b> | 2.41        |       |       |       |
| gapA        | 2.41        |       |       |       |
| ldhA        | 2.36        |       |       |       |
| <b>ridA</b> | 2.36        |       |       |       |
| rimP        | 2.34        |       |       |       |
| hypC        | 2.32        |       |       |       |
| yncl        | 2.32        |       |       |       |
| <b>gapC</b> | 2.32        |       |       |       |
| maa         | 2.3         |       |       |       |
| yfnH        | 2.29        | +     | +     | ++    |
| <b>cybB</b> | 2.27        |       | ++    |       |
| ybcC        | 2.26        | +     |       |       |
| yfnF        | 2.25        | ++    | ++    | ++    |
| <b>yegZ</b> | 2.25        | +     | +     | +     |
| ybeZ        | 2.22        | +     | ++    | +     |
| yfnG        | 2.22        | ++    | ++    | ++    |
| yfcE        | 2.21        | +     | +     | +     |
| curA        | 2.21        |       |       |       |
| tdcE        | 2.2         |       |       | +     |
| hypB        | 2.19        |       |       |       |
| ylcI        | 2.17        |       |       |       |
| <b>aldA</b> | 2.17        |       | ++    |       |
| pptA        | 2.15        | ++    | ++    | ++    |
| rbfA        | 2.14        |       |       |       |
| preA        | 2.13        |       |       |       |
| <b>tehB</b> | 2.08        |       |       |       |
| nrfE        | 2.07        | +     | ++    |       |
| marA        | 2.06        |       |       |       |
| <b>ymjD</b> | 2.05        | +     | +     | +     |
| <b>ydcI</b> | 2.04        |       |       |       |
| <b>ydcP</b> | 2.04        |       |       |       |
| ydaF        | 2.04        |       |       |       |

| G181D       | Fold-change | P279S | G324D | N340S |
|-------------|-------------|-------|-------|-------|
| <b>truB</b> | 2.04        |       |       |       |
| <b>dusC</b> | 2.02        |       | ++    |       |
| hfq         | 2.02        |       |       |       |
| infB        | 2.02        |       |       |       |
| ilvM        | 2.02        | ++    | ++    | +     |
| hybC        | 2           |       |       |       |
| ybcW        | 1.99        |       |       |       |
| hypD        | 1.97        |       |       |       |
| ydcS        | 1.95        |       | ++    |       |
| ybbC        | 1.95        | ++    | +     | ++    |
| hokB        | 1.92        |       |       |       |
| mnaT        | 1.92        |       |       |       |
| csgG        | 1.88        | +     | ++    | ++    |
| ynaJ        | 1.87        |       |       |       |
| ydhY        | 1.86        | ++    |       | ++    |
| <b>rzpD</b> | 1.85        |       |       |       |
| yqeK        | 1.85        |       |       |       |
| hypE        | 1.85        |       |       |       |
| ycaD        | 1.83        |       |       | ++    |
| yhbU        | 1.83        |       |       |       |
| <b>yjeV</b> | 1.82        |       |       |       |
| ariR        | 1.81        |       | +     |       |
| ymglI       | 1.81        |       |       |       |
| mcbR        | 1.8         |       |       |       |
| <b>chaA</b> | 1.8         |       |       |       |
| ymgA        | 1.8         |       | ++    |       |
| ydcK        | 1.77        |       |       |       |
| ribC        | 1.77        |       |       |       |
| ycgZ        | 1.77        |       | +     |       |
| yibW        | 1.74        |       |       |       |
| <b>ydhI</b> | 1.73        | ++    | ++    | +     |
| ydaS        | 1.72        |       |       |       |
| pabC        | 1.71        | ++    | ++    | +     |
| rhsH        | 1.7         |       |       |       |
| mnmH        | 1.7         |       |       |       |
| ynfK        | 1.7         |       |       |       |
| <b>truA</b> | 1.69        |       |       |       |
| yceI        | 1.69        | +     | ++    |       |
| <b>proS</b> | 1.68        |       |       |       |
| cbl         | 1.68        |       | ++    |       |
| ygdI        | 1.67        |       |       |       |
| <b>fimC</b> | 1.67        | ++    | ++    | +     |
| ampC        | 1.67        |       |       |       |
| rlmI        | 1.66        |       |       |       |
| yccT        | 1.66        | ++    | ++    | ++    |
| <b>dgcZ</b> | 1.65        |       |       |       |
| dcuC        | 1.65        |       |       |       |
| tehA        | 1.65        |       |       |       |
| ttcC        | 1.64        |       |       |       |
| ydaG        | 1.64        |       |       |       |
| nirD        | 1.63        |       |       |       |
| ogrK        | 1.61        | ++    | ++    | ++    |
| nikA        | 1.6         |       |       |       |
| yibV        | 1.59        | ++    | ++    | ++    |
| ylbG        | 1.58        |       |       |       |
| pinR        | 1.58        | +     |       |       |
| <b>rrrD</b> | 1.57        |       |       |       |
| csgF        | 1.57        | ++    | ++    | ++    |
| nirB        | 1.57        |       |       |       |
| ybaK        | 1.56        |       |       |       |
| yihA        | 1.55        |       |       |       |
| <b>ydcR</b> | 1.55        |       |       |       |
| chiX        | 1.55        |       |       |       |
| raiR        | 1.55        |       |       |       |
| rsuA        | 1.54        |       |       |       |
| ymgC        | 1.53        |       | ++    |       |
| ydaT        | 1.53        |       |       |       |
| yccF        | 1.53        |       |       |       |
| yceO        | 1.53        |       |       |       |
| kch         | 1.52        |       |       |       |
| yibL        | 1.52        |       |       |       |
| ytfI        | 1.5         | ++    | ++    | ++    |

| G181D       | Fold-change | P279S | G324D | N340S |
|-------------|-------------|-------|-------|-------|
| citD        | 1.5         |       |       | ++    |
| ydaU        | 1.5         |       |       |       |
| nrfF        | 1.5         | +     |       | ++    |
| <b>ymdE</b> | 1.49        | +     | +     | +     |

Genes up-regulated in *nusA* mutants:

R258C  
 G181D

Fold-change in mRNA level with respect to WT *nusA*

*rho* SBS mutants

++ Same gene up-regulated in *rho* mutant

+ Some other gene from the operon up-regulated in *rho* mutant

Upregulated genes common between the two *nusA* mutants are shown in pink.

**mgTA** Riboswitch controlled

Figure S1

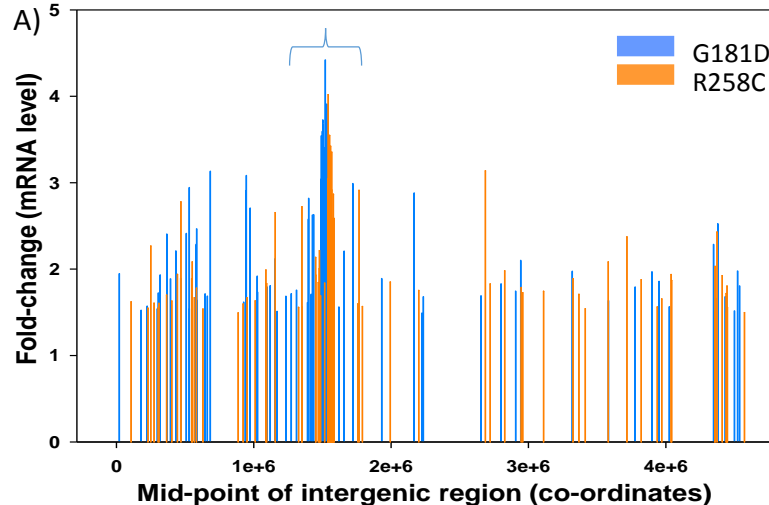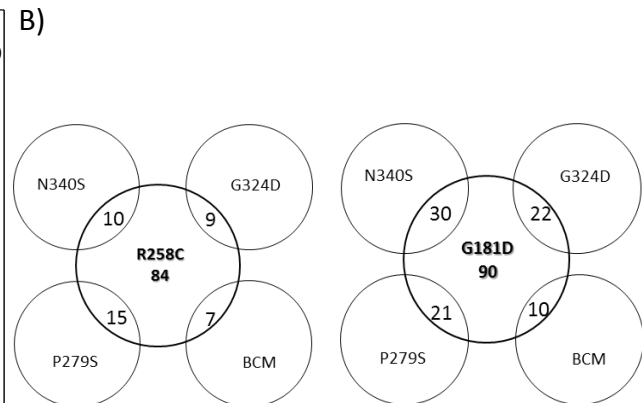

C) *nusA* G181D vs *nusA* R258C comparison. Genes are grouped by operon (Prophage, Rac, DLP12, Qin, CP4-6, P2 remnant) and further by *nusA* and *rho* sub-operons. Gene expression is indicated by ++ (identical up-regulation) or + (some other gene up-regulated).

|            | <i>nusA</i> G181D |            |       |       |     | <i>nusA</i> R258C |              |       |       |       |     |
|------------|-------------------|------------|-------|-------|-----|-------------------|--------------|-------|-------|-------|-----|
|            | <i>nusA</i>       | <i>rho</i> |       |       |     | <i>nusA</i>       | <i>rho</i>   |       |       |       |     |
| Prophage   | G181D             | P279S      | G324D | N340S | BCM | Prophage          | R258C        | P279S | G324D | N340S | BCM |
| Rac        | <b>racR</b>       |            |       |       |     | Rac               | <b>ydaF</b>  |       |       |       |     |
|            | <b>ydaW</b>       |            |       |       |     |                   | <b>ydaS</b>  |       |       |       |     |
|            | <b>ydaF</b>       |            |       |       |     |                   | <b>racR</b>  |       |       |       |     |
|            | lomR              |            |       |       |     |                   | <b>ydaW</b>  |       |       |       |     |
|            | <b>rzoR</b>       |            |       |       |     |                   | kilR         |       |       |       |     |
|            | ybcW              |            |       |       |     |                   | <b>rzoR</b>  |       |       |       |     |
|            | <b>ydaS</b>       |            |       |       |     | ydaY              |              |       |       |       |     |
|            | ydaG              |            |       |       |     | DLP12             | <b>insE1</b> | +     | +     | +     | ++  |
|            | pinR              | ++         |       |       | ++  |                   | <b>rzpD</b>  |       |       |       |     |
|            | ydaT              |            |       |       |     |                   | <b>rzoD</b>  |       |       |       |     |
|            | ydaU              |            |       |       |     |                   | <b>rrrD</b>  |       |       |       |     |
|            | rzpR              |            |       |       |     |                   | essD         |       |       |       |     |
| DLP12      | <b>rrrD</b>       |            |       |       |     | Qin               | <b>pinQ</b>  | ++    |       |       | ++  |
|            | ybcW              |            |       |       |     | CP4-6             | <b>yafY</b>  | +     | +     | +     | ++  |
|            | <b>rzoD</b>       |            |       |       |     |                   | ykfG         | ++    | ++    | ++    | +   |
|            | <b>insE1</b>      | +          | +     | +     | ++  |                   | <b>yafX</b>  | ++    | ++    | ++    | +   |
| Qin        | <b>pinQ</b>       | ++         |       |       | ++  | insH1             |              |       |       |       |     |
| CP4-6      | <b>yafY</b>       | +          | +     | +     | +   | ykfI              | ++           | ++    | ++    | +     |     |
|            | <b>yafX</b>       | ++         | ++    | ++    |     | CP4-44            | insC1        | ++    | ++    | ++    | ++  |
| P2 remnant | ogrK              | ++         | ++    | ++    | ++  | Qsr               | nmpC         |       |       |       |     |
|            |                   |            |       |       |     | e14               | ymfD         | ++    | ++    |       |     |

++ identical gene up-regulated  
 + Some other gene from same operon up-regulated.  
 Genes in bold are shared between the two *nusA* mutants.

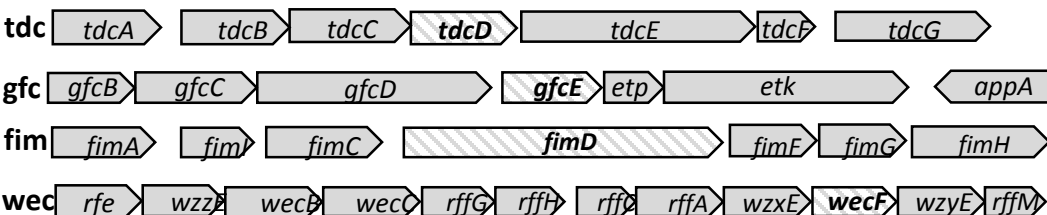

D) *nusA* G181D

| Small RNA | Fold-change |
|-----------|-------------|
| chiX      | 1.55        |
| rydC      | 4.57        |

*nusA* R258C

| Small RNA            | Fold-change |
|----------------------|-------------|
| rydC                 | 4.25        |
| sokB                 | 1.70        |
| rdIC                 | 1.64        |
| rttR                 | 1.42        |
| rdIB                 | 1.40        |
| tRNA <sup>thrV</sup> | 1.59        |

E) *wec* operon

| Genes | R258C | P279S | N340S | G324D |
|-------|-------|-------|-------|-------|
| rfe   |       |       |       |       |
| wzzE  |       |       |       |       |
| wecB  |       |       | 1.59  | 1.54  |
| wecC  |       |       |       |       |
| rffG  | 1.65  |       |       |       |
| rffH  | 1.68  |       |       |       |
| rffC  | 1.51  | 2.04  | 1.79  | 1.48  |
| rffA  |       | 2.00  | 2.21  | 1.91  |
| wzxE  | 2.02  |       |       |       |
| wecF  | 1.95  |       | 2.5   | 2.06  |
| wzyE  | 1.55  | 1.84  | 2.31  | 1.79  |
| rffM  |       | 1.69  | 1.84  |       |

| gfc operon  |       |       |       |       | fim operon  |       |       |       | tdc operon |             |       |       |       |
|-------------|-------|-------|-------|-------|-------------|-------|-------|-------|------------|-------------|-------|-------|-------|
| Genes       | G181D | P279S | N340S | G324D | Genes       | R258C | P279S | N340S | G324D      | Genes       | G181D | P279S | N340S |
| appA        |       |       |       |       | fimA        | 1.98  | 1.64  |       | 1.77       | tdcG        |       | 2.01  | 2.9   |
| etk         |       | 2.9   | 2.3   | 4.1   | fimI        | 2.29  | 1.9   |       |            | tdcF        |       |       |       |
| etp         |       | 5.8   | 4.7   | 5.6   | fimC        |       | 2.9   |       | 2.8        | tdcE        | 2.20  | 2.14  | 2.75  |
| <b>gfcE</b> | 1.54  | 4.29  | 2.92  | 4.0   | <b>fimD</b> | 2.63  | 1.8   | 1.89  | 3.7        | <b>tdcD</b> | 3.57  | 2.0   | 1.9   |
| gfcD        |       | 6.9   | 4.87  | 5.6   | fimF        | 2.05  | 2.8   | 1.7   | 3.7        | tdcC        |       |       |       |
| gfcC        |       | 6.5   | 5.8   | 5.9   | fimG        | 1.83  | 2.3   | 2.1   | 3.9        | tdcB        |       |       |       |
| gfcB        |       | 7.8   | 3.7   | 3.3   | fimH        |       | 1.87  |       | 2.58       | tdcA        |       |       |       |

Figure S2

**Figure S1:** Tables showing the complete lists of the up-regulated genes (>1.5 fold with p value <0.2) from the Agilent tiling microarray profiles obtained in the presence of the NusA mutants, R258C (left panels) and G181D (right panels). Fold changes (2<sup>nd</sup> column) in the hybridization intensities were obtained from the ratios of mutants and the WT NusA. Common up-regulated genes between the two NusA mutants are indicated in pink shades. Same genes or those from the same operons those were upregulated in three Rho mutants, N340S, G324D and P279S, are indicated as “++” or “+”, respectively, against the gene names. The micro-array data obtained for Rho mutants were originally reported in Ref. 1. This overlap between the Rho and NusA mutants could be under-estimated as the Rho data were obtained from a low density micro-array having fewer probes. Meaning of different notations are described in the figure. *mgtA*, expression which is under riboswitch control is indicated in green shade.

**Figure S2. A)** Plots showing the fold change in the mRNA level of the NusA mutants *w.r.t* the WT strain from the intergenic regions that do not code any gene. The co-ordinate of the intergenic region in the X-axis is expressed as the mid-point of each of the intergenic stretch. The fold change is the average fold change calculated from the fold changes of all the probes corresponding to each intergenic region. **B)** Venn diagrams showing the pattern of overlap of these up-regulated intergenic regions among the NusA and Rho mutants and also the pattern obtained in the presence of bicyclomycin (BCM), antibiotic that binds to Rho. In these analyses, we included the same and the neighboring ( $\pm$  300nt) intergenic regions. **C)** List of prophage genes that are upregulated both in the NusA (G181D, R258C) and Rho mutants (P279S, G324D, N340S) and also upon addition of BCM. Meaning of “+” and “++” are indicated below the tables. **D)** The list of small RNA genes that are up-regulated in the NusA mutants. **E)** Description of some of the long operons, *tds*, *gfc*, *fim* and *wec*, of which at least one of the genes (*tdcD*, *gfcE*, *fimD* and *wecF*; indicated by shades) were upregulated in the NusA and Rho mutants as validated by q-PCR assays (figure 8). Different tables show the fold changes in gene expression levels of different genes in these long operons in the presence of different NusA and Rho mutants. The fold changes *w.r.t* the WT strain for the Rho mutants were obtained from ref. 1.

Reference:

1. Shashni, R., S. Mishra, B.S. Kalayani & R. Sen, (2012) Suppression of in vivo Rho-dependent transcription termination defects: evidence for kinetically controlled steps. *Microbiology* **158**: 1468-1481.
